# Supplementary material
Source: publisher figshare collection journal article supplement (https://acs.figshare.com/ndownloader/files/3899017)
Supplement: Supplementary file 1 [file 3899017]

## **Supporting Information**

### **The Theoretical Limit to Plant Productivity**

Evan H. DeLucia<sup>i,ii,iii\*</sup>, Nuria Gomez-Casanovas<sup>ii</sup>, Jonathan Greenberg<sup>iv</sup>, Tara Hudiburg<sup>ii</sup>, Ilsa B. Kantola<sup>ii</sup>, Stephen P. Long<sup>i,ii,v</sup>, Adam Miller<sup>ii</sup>, Donald R. Ort<sup>i,v,vi</sup>, William J. Parton<sup>vii</sup>

<sup>i</sup>Department of Plant Biology, University of Illinois, Urbana, Illinois 61801, United States

<sup>ii</sup> Energy BioScience Institute, University of Illinois, Urbana, Illinois 61801, United States

<sup>iii</sup> Institute for Sustainability, Energy, and Environment, Institute, University of Illinois,  
Urbana, Illinois 61801, United States

<sup>iv</sup> Department of Geography and Geographic Information Science, University of Illinois,  
Urbana, Illinois 61801, United States

<sup>v</sup> Department of Crop Science, University of Illinois, Urbana, Illinois 61801, United States

<sup>vi</sup> Photosynthesis Research Unit, USDA/ARS, Urbana, Illinois 61801, United States

<sup>vii</sup> Natural Resource Ecology Laboratory, Colorado State University, Fort Collins, Colorado  
80523, United States

14 Pages; 3 Figures; 2 Tables

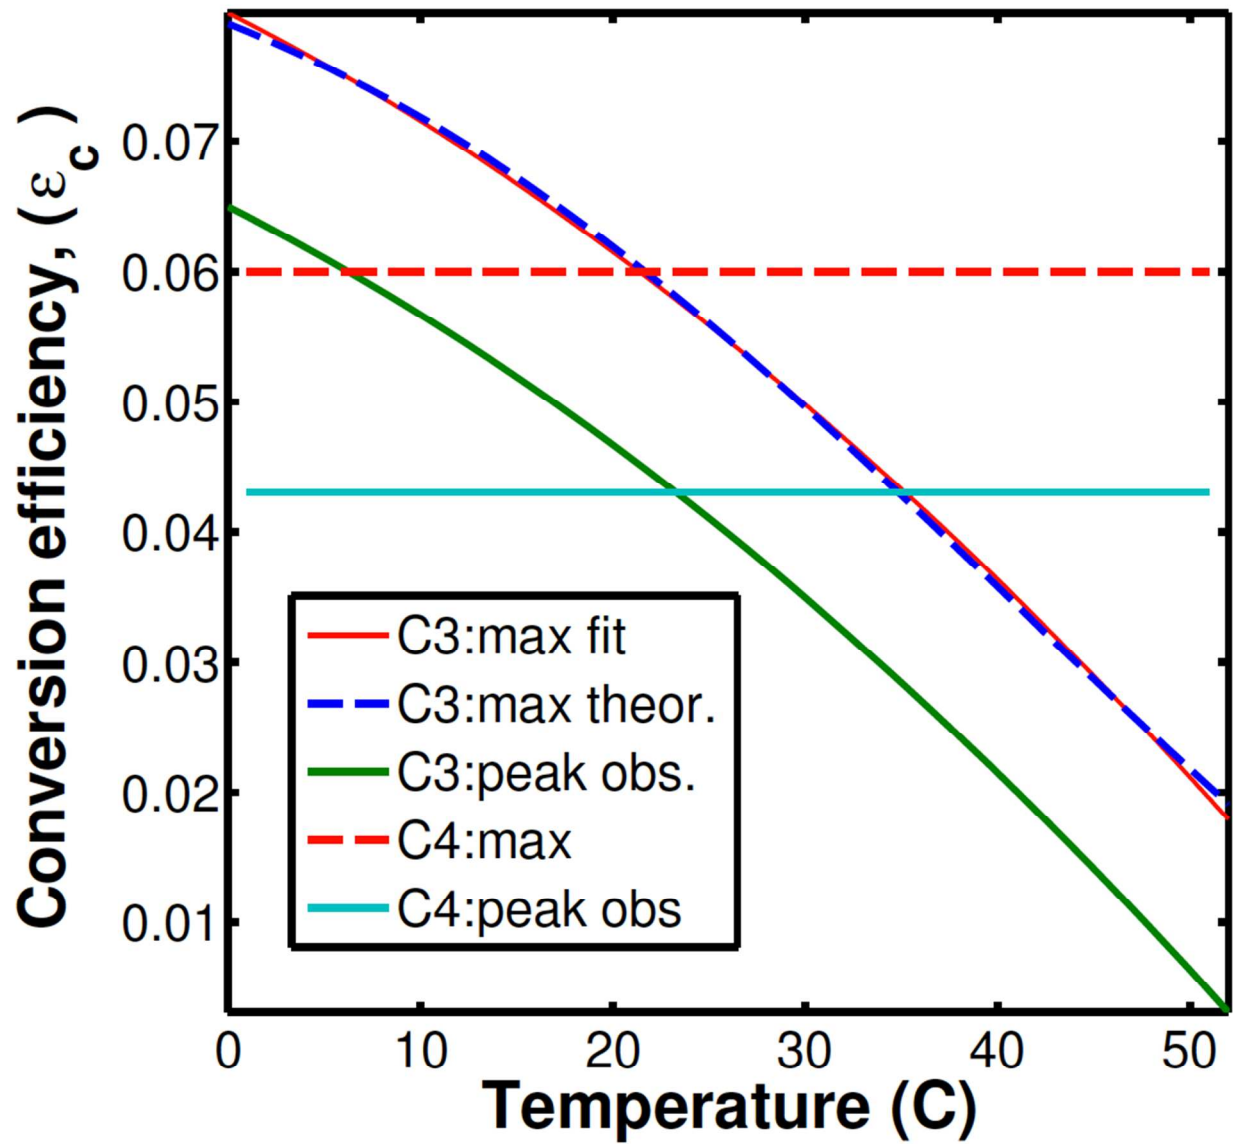

Supporting Figure 1. Temperature dependence of conversion efficiency used to model the theoretical upper limit to NPP. Functions were calculated assuming a  $\text{CO}_2$  concentration of  $379 \mu\text{l l}^{-1}$ . The theoretical maximum  $\epsilon_c$  for C4 and C3 plants (1) are shown in dashed red line and the solid red line, respectively. The temperature dependence of  $\epsilon_c$  for C3 plants derives primarily from relative changes in oxygenase and carboxylase functions of the

primary carboxylating enzyme, ribulose biphosphate carboxylase-oxygenase, and the relative temperature dependencies of the diffusion coefficients for CO<sub>2</sub> and O<sub>2</sub> (2). The dashed blue line represents an independent calculation of  $\epsilon_c$  for C3 crops (3). Here we assume that respiration is a constant fraction of photosynthesis. The solid teal line and the solid green line represent the maximum  $\epsilon_c$  currently observed for a C4 and C3 plant, respectively.

1. Zhu X-G, Long SP, Ort DR (2010) *Ann. Rev. Plant Bio.* **61**, 235-261.
2. Sage RS, Kubien DS (2007) *Plant Cell Env.* **30**, 1086-1106.
3. Bernacchi CJ, Singaas EL, Pimentel C, Portis AR, Long SP (2001) *Plant Cell Env.* **24**, 253-259.

MODIS derived NPP vs. NASS derived NPP for the USA cornbelt

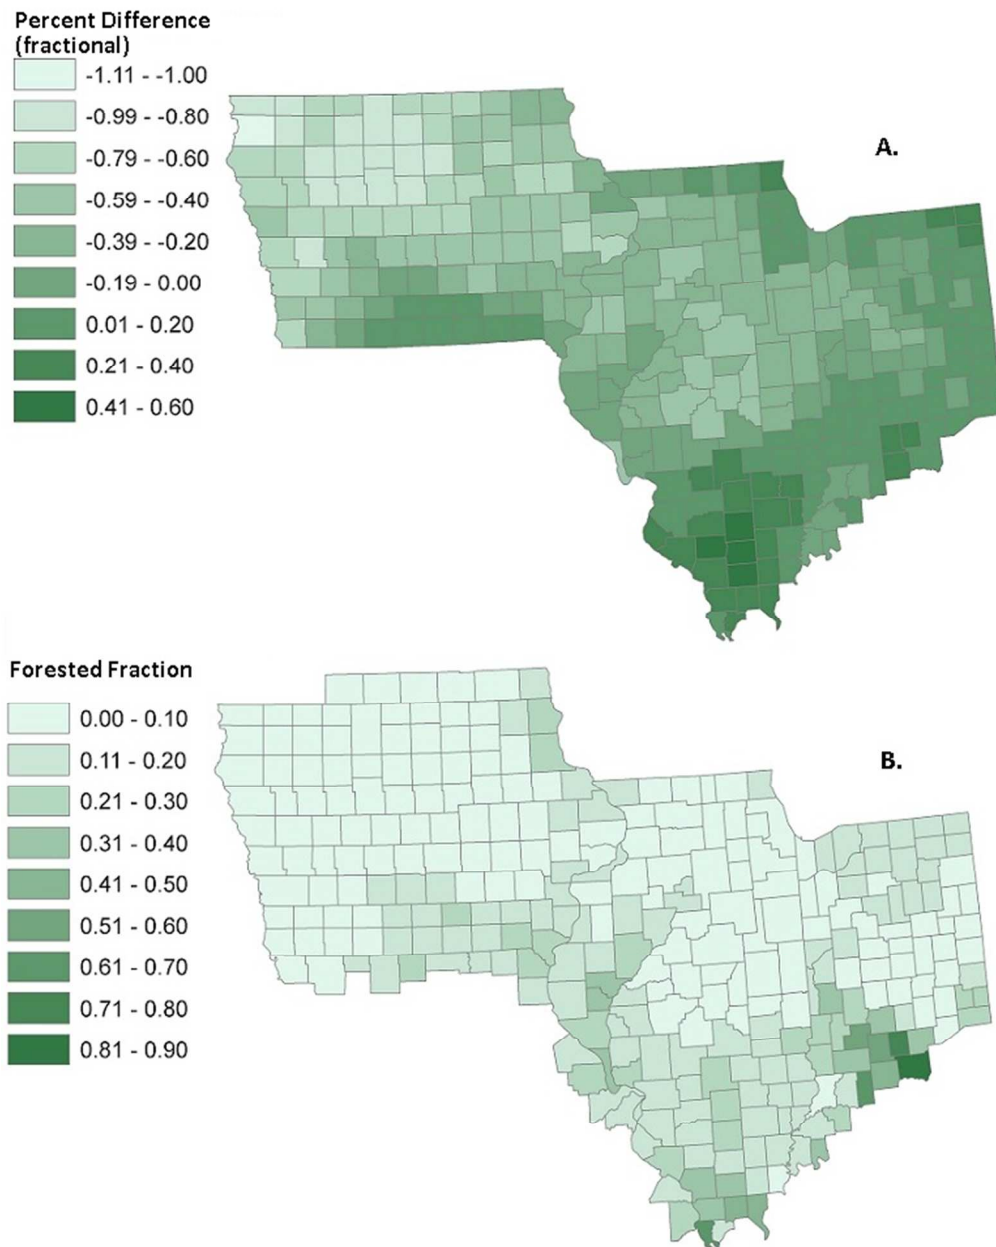

Supplemental Figure 2

Supporting Figure 2. Maps of the difference between MODIS derived NPP and National Agricultural Statistics (NASS) derived NPP for counties in Iowa, Illinois, and Indiana (US corn belt). A) Negative numbers indicate an underestimation of NPP by MODIS compared to NASS data while positive numbers indicated an overestimation compared to NASS data. B) The fractional forested land area of each county. As forested land area increases, the underestimation of NPP compared to MODIS is reduced. County average MODIS NPP was compared to county average crop NPP (area-weighted by crop type). NASS crop area in each county was calculated using the NASS cropland data layer (<http://nassgeodata.gmu.edu/CropScape/>).

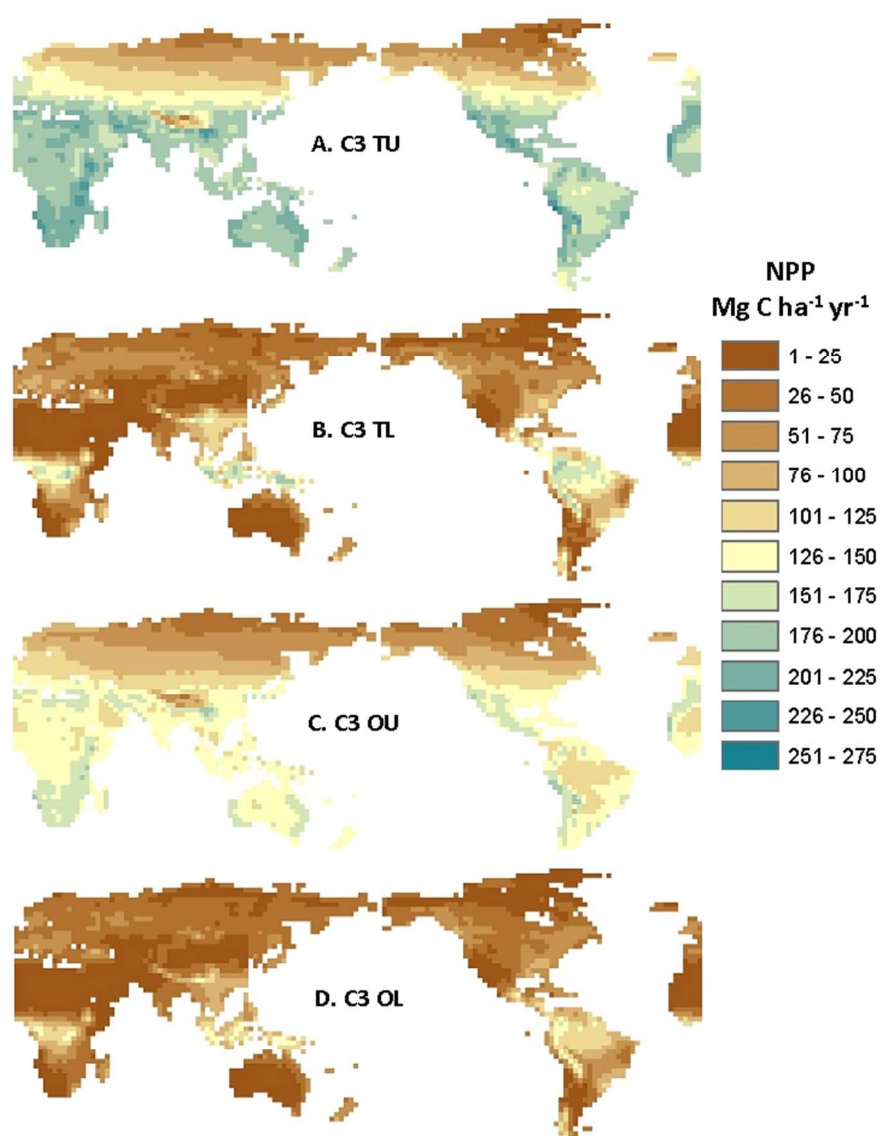

Supporting Figure 3A

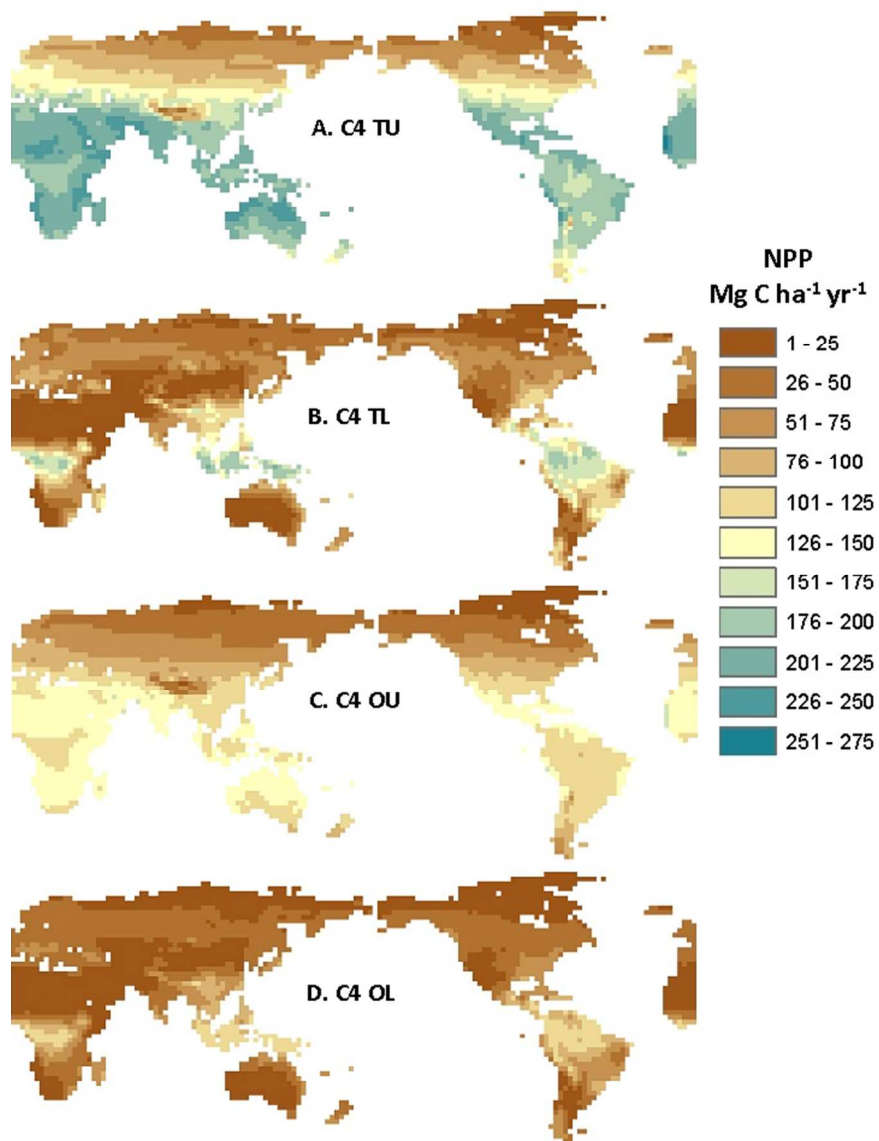

Supporting Figure 3B

Supporting Figure 3. Global distribution of predicted maximum net primary production (NPP;  $\text{tC ha}^{-1} \text{y}^{-1}$ ) based on the theoretical maximum light conversion efficiency for a theoretical C3 crop (A) or a theoretical C4 crop (B). Values represent the predicted maximum total NPP (TU), maximum NPP supported by local water availability (TL), and NPP based using actual maximum observed conversion efficiency and local water availability (OL).



| Crop (country)          | Scientific name               | WUE   | Reference |
|-------------------------|-------------------------------|-------|-----------|
| Soybean (Australia)     | <i>Glycine max</i>            | 0.044 | 2         |
| Canola (Australia)      | <i>Brassica napus</i>         | 0.057 | 7         |
| Wheat (Argentina)       | <i>Triticum aestivum</i>      | 0.045 | 4         |
| Willow (Sweden)         | <i>Salix viminalis</i>        | 0.048 | 4         |
| C3 average              |                               | 0.049 |           |
| Miscanthus (England)    | <i>Miscanthus x giganteus</i> | 0.095 | 1         |
| Sugarcane (Australia)   | <i>Saccharum officinarum</i>  | 0.083 | 3         |
| Cord-grass (England)    | <i>Spartina cynosuroides</i>  | 0.082 | 1         |
| Bulrush Millett (India) | <i>Pennisetum typhoides</i>   | 0.095 | 5         |
| Maize (US average)      | <i>Zea mays</i>               | 0.101 | 6         |
| C4 average              |                               | 0.091 |           |

Supporting Table 1. Water use efficiency for C3 and C4 crops (t DM / ha / mm \*kPa), where values are normalized to daytime atmospheric VPD during the growing season. Average WUE is considerably greater for C4 than C3 crops. Because of the absence of photorespiration and the affinity of the primary carboxylating enzyme for CO<sub>2</sub>, C4 plants operate a lower CO<sub>2</sub> concentration inside the leaf and lower stomata conductance, contributing to higher WUE than C3 crops.

1. Beale CV, Morison JIL, Long SP (1999) *Ag. For. Met.* 96:103-115b.
2. Bhattarai SP, Midmore DJ, Pendergast L (2008) *Irrigation Sci.* 26:439-450.
3. Inman-Bamber NG, McGlinchey MG (2003) *Field Crops Res.* 83:125-138.
4. Lindroth A, Cienciala E (1996) *Tree Phys.* 16:257-262.

5. Squire GR (1990) *The Physiology of Tropical Crop Production*. Wallingford, UK: CABI. 236.
6. Tanner CB, Sinclair TR (1983) in *Limitations to Water use in Crop Production*, Taylor HM, J.W.R., and S.T.R., Editors., ASA, CSSA, SSSA: Madison WI, USA. p. 1-27.
7. Zeleke KT, Luckett D, Cowley R. (2011) *Agron. J.* 103:1610-1618.

| Location                    | Native Vegetation             | ANPP               | Introduced Vegetation             | ANPP             | ANPP Increase |
|-----------------------------|-------------------------------|--------------------|-----------------------------------|------------------|---------------|
| Wisconsin, USA <sup>1</sup> | Restored prairie              | 0.8                | No-till maize                     | 5.1              | 540%          |
| Iceland <sup>2</sup>        | Boreal dwarf birch            | 1.0*               | Nootka lupine                     | 5.0*             | 400%          |
| Illinois, USA <sup>3</sup>  | Native prairie                | 3.2 <sup>4,5</sup> | <i>Miscanthus giganteus</i>       | 8.2 <sup>6</sup> | 322%          |
| Thailand <sup>7</sup>       | Dry deciduous tropical forest | 3.8 <sup>8</sup>   | Teak plantation                   | 11.5             | 206%          |
| Hawaii, USA <sup>9</sup>    | Wet tropical forest           | 2.0                | <i>Falcataria</i> -invaded forest | 5.4              | 170%          |
| Kansas, USA <sup>10</sup>   | Tallgrass prairie             | 2.4 <sup>11</sup>  | <i>Juniperus</i> shrubland        | 4.9              | 102%          |
| India <sup>12</sup>         | Moist tarai sal forest        | 7.3                | <i>Populus</i> plantation         | 12.5             | 71%           |
| Texas, USA <sup>13</sup>    | Coastal prairie               | 1.6                | <i>Prosopis</i> shrubland         | 2.6              | 63%           |
| India <sup>14</sup>         | Dry deciduous tropical forest | 9.6 <sup>15*</sup> | Bamboo plantation                 | 13.5             | 40%           |

Supporting Table 1 with references. Location, vegetation, and productivity (aboveground NPP; tC ha<sup>-1</sup> yr<sup>-1</sup>) of eight sites where annual productivity changes with conversion to non-native or cultivated vegetation. When native vegetation yield was not available in the cited article, it was drawn from a separate literature source from the same ecoregion. ANPP was converted to ANPP-carbon (ANPP-C) by a factor of 0.46 for grasslands<sup>16</sup>, 0.47 for tropical species<sup>2117</sup>, and 0.5 for temperate woody species<sup>18,19</sup>. \*ANPP unavailable, NPP shown.

- 
- <sup>1</sup> Brye, K.R. *et al.* Carbon budgets for a prairie and agroecosystems: effects of land use and interannual variability. *Ecol. App.* **12**, 962-979 (2002).
- <sup>2</sup> Korner, C., *et al.* Scientific report CLIMMANI-ESF workshop;  
[http://www.climmani.org/CLIMMANI/Documents/Nfix\\_FinalReport4292.pdf](http://www.climmani.org/CLIMMANI/Documents/Nfix_FinalReport4292.pdf) (2012).
- <sup>3</sup> Anderson-Teixeira, K.A. *et al.* Changes in soil organic carbon under biofuel crops. *Glob Change Biol Bioenergy* **1**, 75-96 (2009).
- <sup>4</sup> Briggs, J.T. & Knapp, A.K. Interannual variability in primary production in tallgrass prairie-climate, soil-moisture, topographic position, fire as determinants of aboveground biomass. *Am. J. Bot.* **82**,1024-1030 (1995).
- <sup>5</sup> Heaton, E.A., Dohleman, F.G. & Long, S.P. Interannual variability in primary production in tallgrass prairie- climate, soil-moisture, topographic position, fire as determinants of aboveground biomass. *Glob. Change. Biol.* **14**, 2000-2014 (2008)..
- <sup>6</sup> Anderson, E. *et al.* Growth and agronomy of *Miscanthus x giganteus* for biomass production. *Biofuels* 2:167-183 (2011).
- <sup>7</sup> Takahashi, M. *et al.* Carbon cycling in teak plantations in comparison with seasonally dry tropical forests in Thailand. In: *Forest Ecosystems--More than Just Trees*. Blanco JA, Lo Y-H, eds. InTech, Croatia, pp. 209-230 (2012).
- <sup>8</sup> Martin, A.R. & Thomas, S.C. A reassessment of carbon content in tropical trees. *PLoS ONE* 6(8): e23533. Doi: 10.1371/journal.pone.0023533 (2011).
- <sup>9</sup> Hughes, R.F. & Denslow, J.S. Invasion by a N<sub>2</sub>-fixing tree alters function and structure in wet lowland forests of Hawaii. *Eco. App.* **15**, 1615-1628 (2005).

- 
- <sup>10</sup> Norris, M.D. *et al.* Assessing changes in biomass, productivity, and C and N stores following *Juniperus virginiana* forest expansion into tallgrass prairie. *Can. J. For. Res.* **31**, 1940-1946 (2001).
- <sup>11</sup> Knapp, A.K. *et al.* Patterns and controls of aboveground net primary production in tallgrass prairie. In: *Grassland Dynamics: Long-Term Ecological Research in Tallgrass Prairie*. Knapp, A.K. *et al.*, ed. Oxford University Press, New York, pp. 193-221 (1998).
- <sup>12</sup> Lodhiyal, L.S. & Lodhiyal, N. Variation in biomass and net primary productivity in short rotation high density central Himalayan poplar plantations. *For. Ecol. Manag.* **98**, 167-179 (1977).
- <sup>13</sup> Archer, A., Boutton, T.W. & Hibbard, K.A. Trees in grasslands: Biogeochemical consequences of woody plant expansion. In: *Global Biogeochemical Cycles in the Climate System*. Schulze, E.D. *et al.* eds. Academic Press, San Diego CA. pp. 115-137 (2001).
- <sup>14</sup> Singh, A.N. & Singh, J.S. Biomass, net primary production and impact of bamboo plantation on soil redevelopment in a dry tropical region. *For. Eco. Manag.* **119**, 195-207 (1999).
- <sup>15</sup> Singh, L. & Singh, J.S. Species structure, dry matter dynamics and carbon flux of a dry tropical forest in India. *Ann. Bot.* **68**, 275-284 (1991).
- <sup>16</sup> Knapp, A.K. *et al.* Patterns and controls of aboveground net primary production in tallgrass prairie. In: *Grassland Dynamics: Long-Term Ecological Research in Tallgrass Prairie*. Knapp, A.K. *et al.*, ed. Oxford University Press, New York, pp. 193-221 (1998).
- <sup>17</sup> Martin, A.R. & Thomas, S.C. A reassessment of carbon content in tropical trees. *PLoS ONE* **6**(8): e23533. Doi: 10.1371/journal.pone.0023533 (2011).

---

<sup>18</sup> Lamloom, S.H. & Savidge, R.A. A reassessment of carbon content in wood: variation within and between 41 North American species. *Biomass & Bioen.* **25**, 381-388 (2003). Lamloom, S.H. & Savidge, R.A. A reassessment of carbon content in wood: variation within and between 41 North American species. *Biomass & Bioen.* **25**, 381-388 (2003).

<sup>19</sup> Thomas, S.C. & Malczewski, G. Wood carbon content of tree species in Eastern China: Interspecific variability and the importance of the volatile fraction. *J. Environ. Manag.* **85**, 659-662 (2007).
